# Supplementary material for: Sensing of viral and endogenous RNA by ZBP1/DAI induces necroptosis
Source: PubMed Central journal article supplement (PMC5579359; doi:10.15252/embj.201796476), 2017-07-17

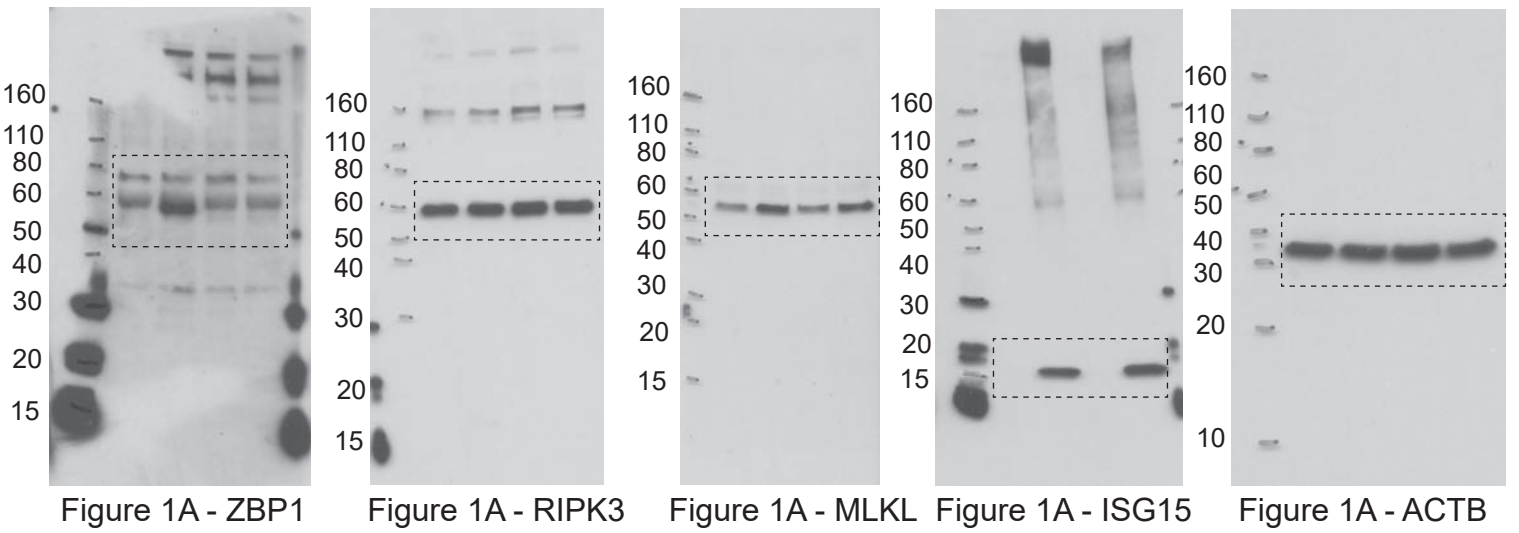

(top = +RIPK3; bottom = w/o RIPK3)

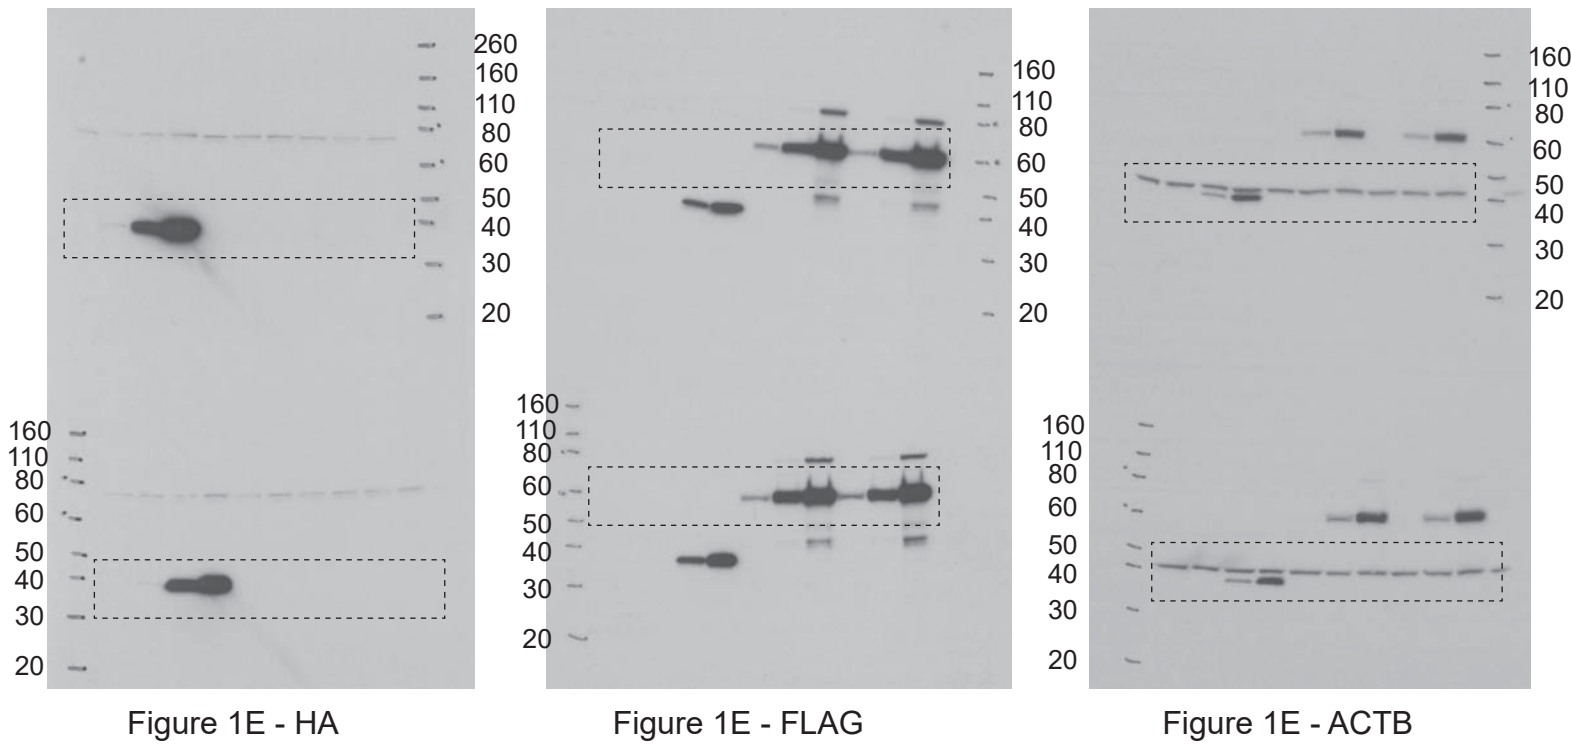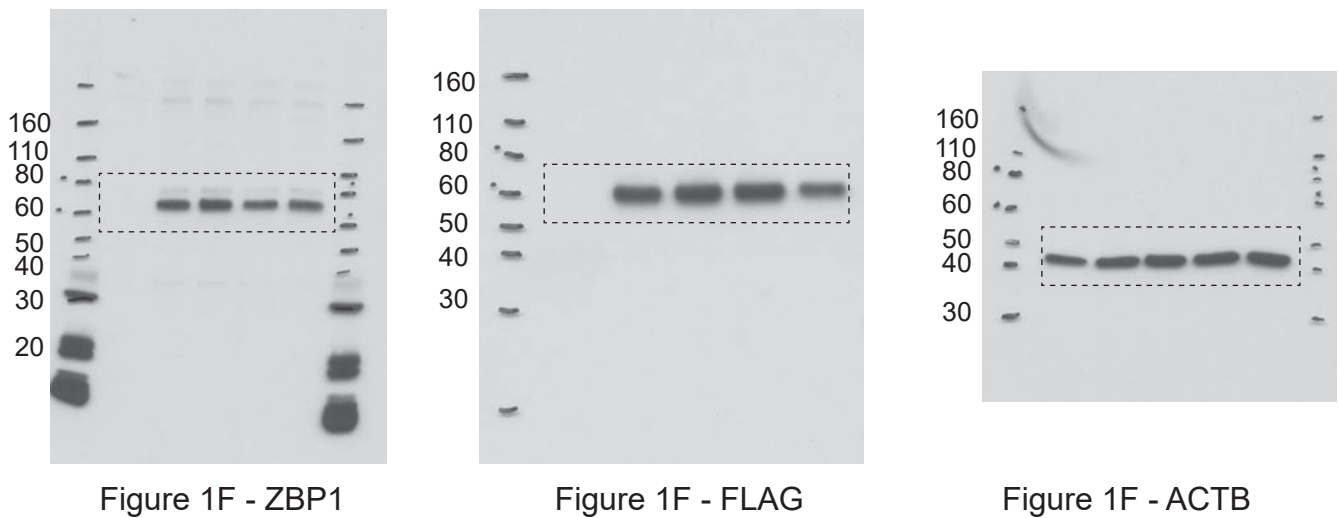

Supplement: EMBJ-36-2529-s003.pdf [file EMBJ-36-2529-s003.pdf]
