# Supplementary material for: Sensing of viral and endogenous RNA by ZBP1/DAI induces necroptosis
Source: PubMed Central journal article supplement (PMC5579359; doi:10.15252/embj.201796476), 2017-07-17
Supplement: EMBJ-36-2529-s004.pdf [file EMBJ-36-2529-s004.pdf]

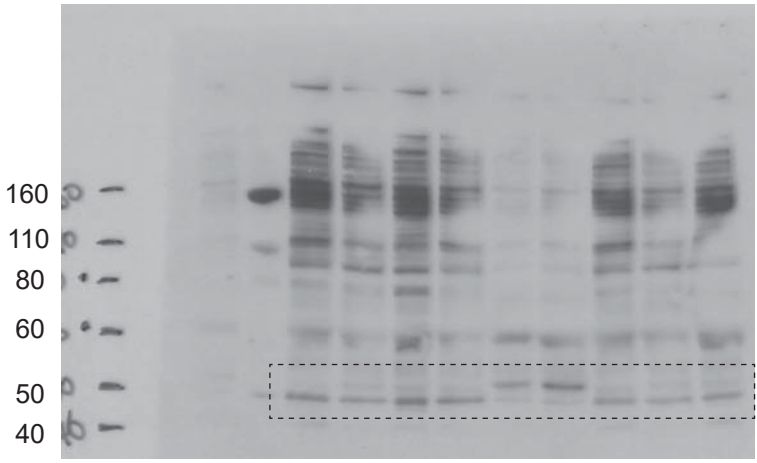

Figure 2C\_P-MLKL

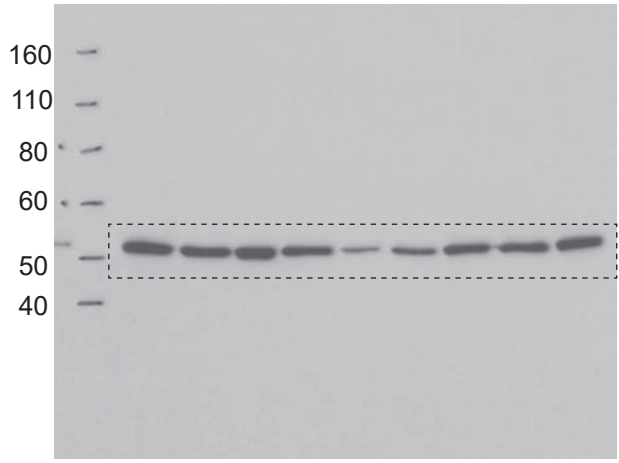

Figure 2C\_MLKL

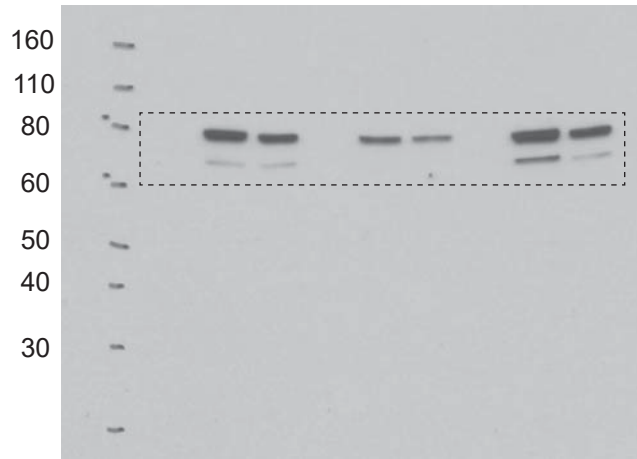

Figure 2C\_IE1

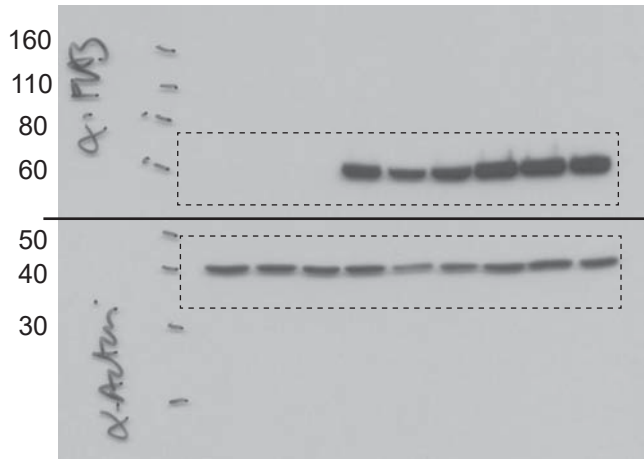

Figure 2C\_FLAG/ACTB
