# Supplementary material for: Sensing of viral and endogenous RNA by ZBP1/DAI induces necroptosis
Source: PubMed Central journal article supplement (PMC5579359; doi:10.15252/embj.201796476), 2017-07-17
Supplement: EMBJ-36-2529-s005.pdf [file EMBJ-36-2529-s005.pdf]

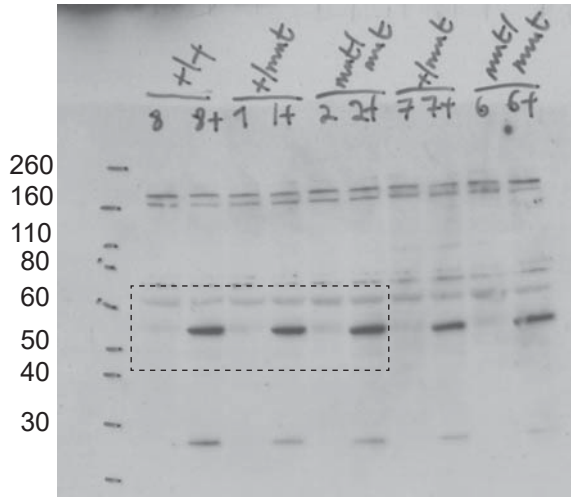

Figure 3A\_ZBP1 (Zippy-1)

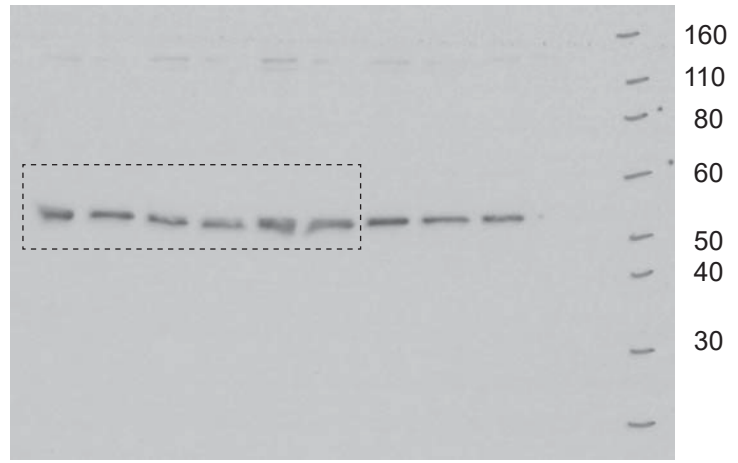

Figure 3A\_RIPK3

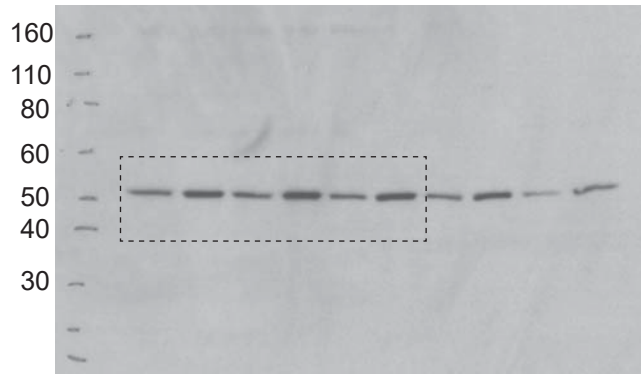

Figure 3A\_MLKL

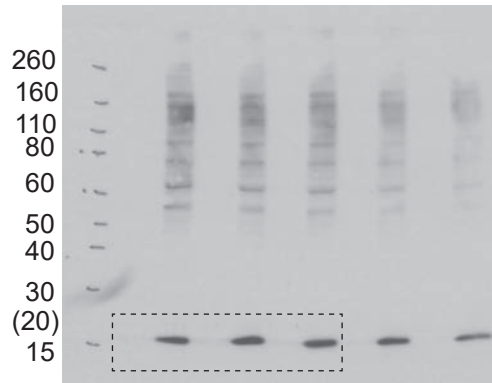

Figure 3A\_ISG15

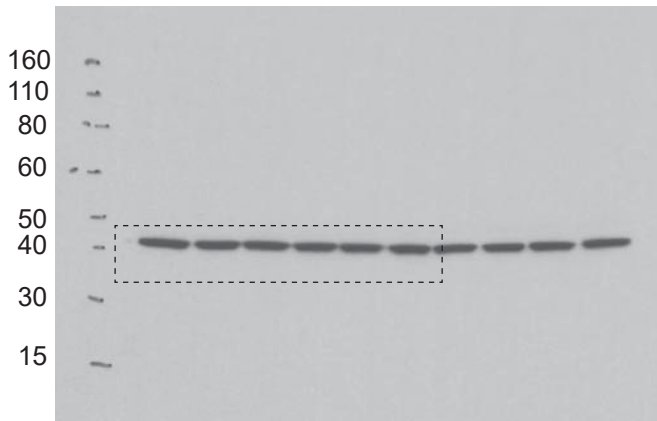

Figure 3A\_ACTB

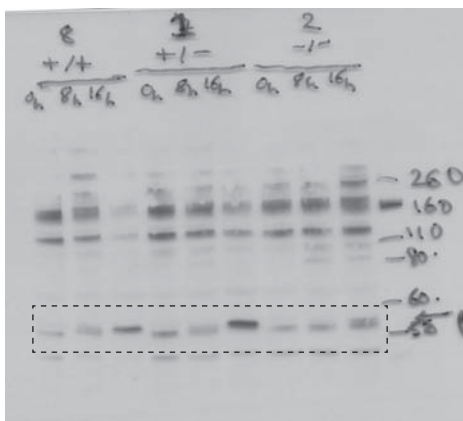

Figure 3D\_P-MLKL

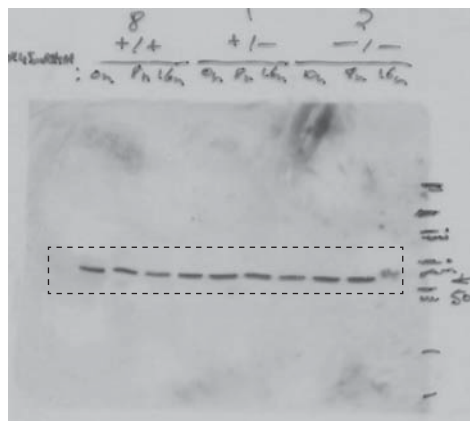

Figure 3D\_ZBP1 MLKL

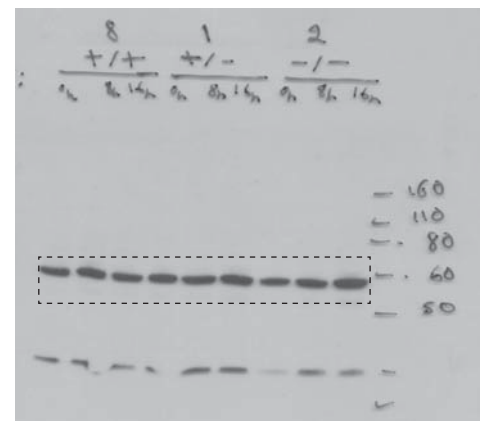

Figure 3D\_ZBP1 (Zippy-1)

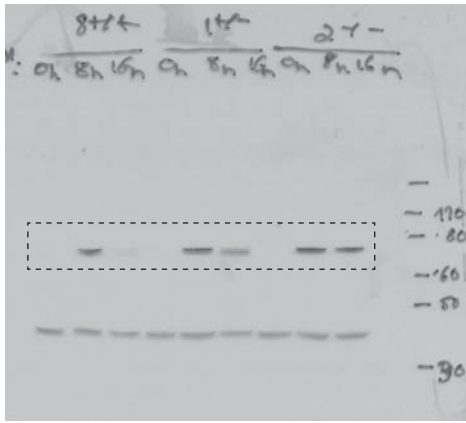

Figure 3D\_IE1

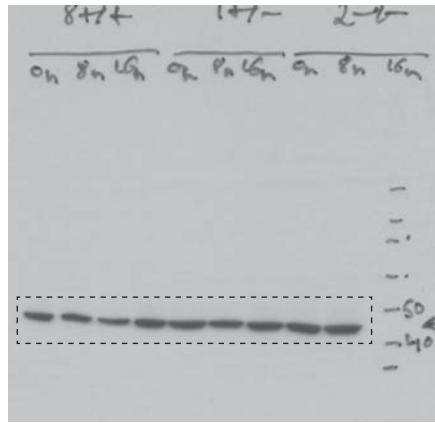

Figure 3D\_ACTB

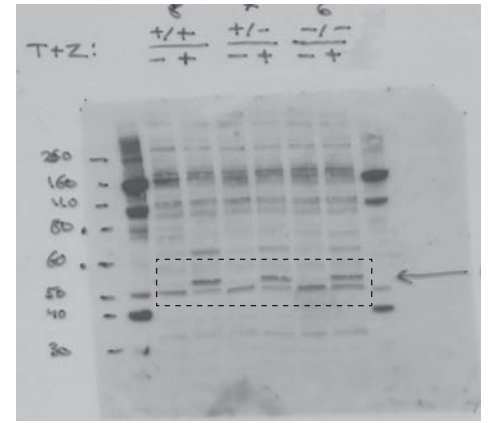

Figure 3E\_P-MLKL

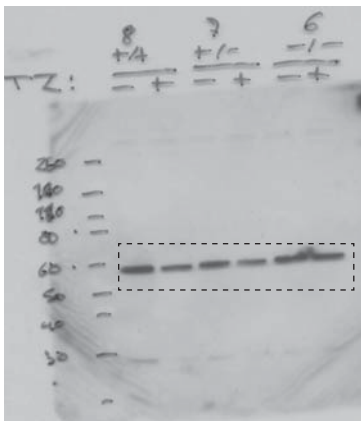

Figure 3E\_ZBP1 (Zippy-1)

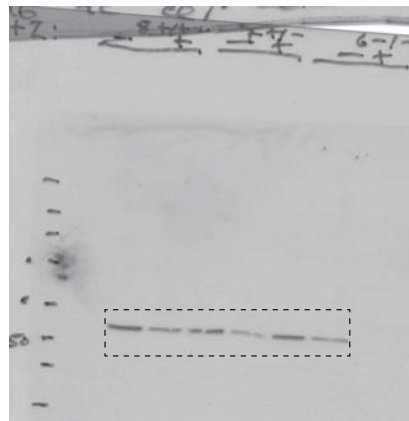

Figure 3E\_MLKL

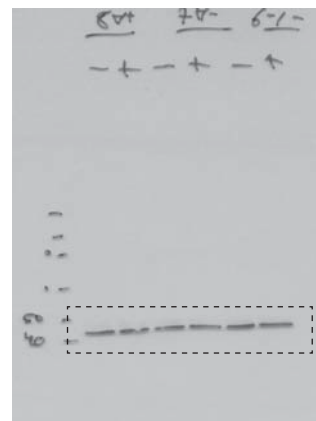

Figure 3E\_ACTB
