# Supplementary material for: Sensing of viral and endogenous RNA by ZBP1/DAI induces necroptosis
Source: PubMed Central journal article supplement (PMC5579359; doi:10.15252/embj.201796476), 2017-07-17
Supplement: EMBJ-36-2529-s007.pdf [file EMBJ-36-2529-s007.pdf]

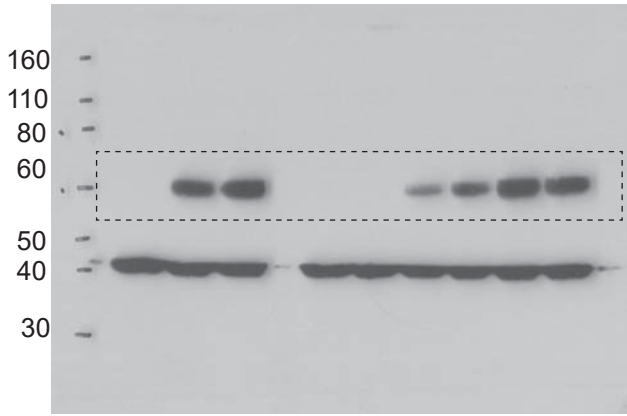

Figure 5C\_FLAG (&ACTB)

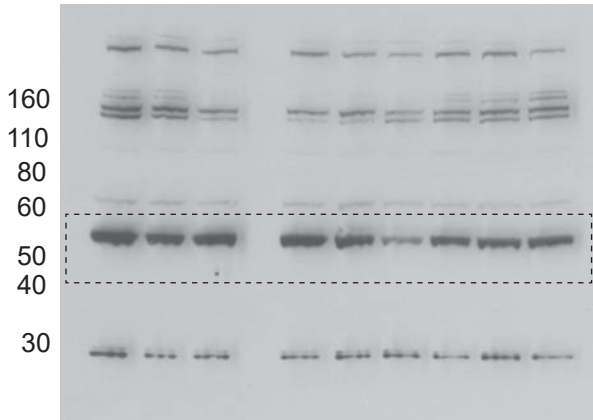

Figure 5C\_RIPK3

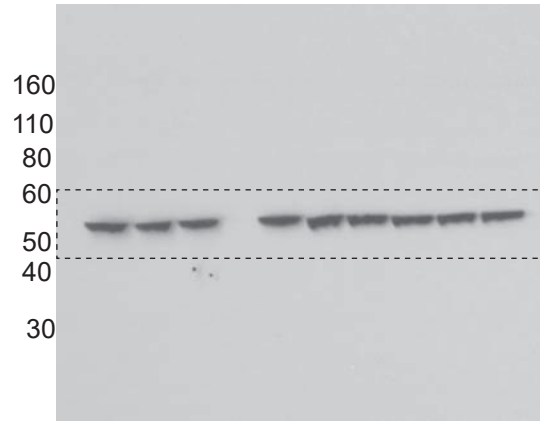

Figure 5C\_MLKL

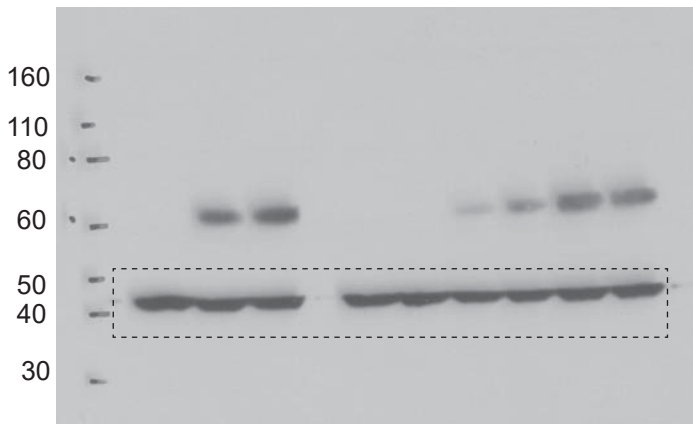

Figure 5C\_(FLAG)&ACTB

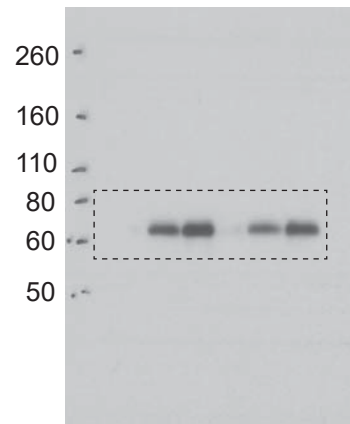

Figure 5F\_FLAG

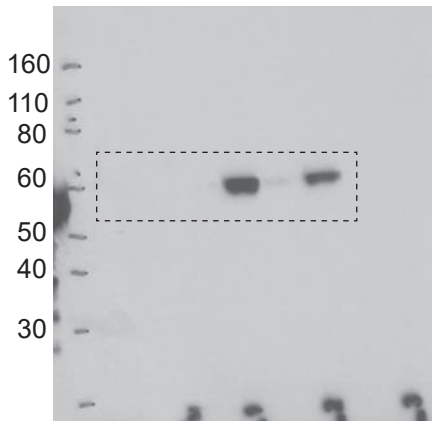

Figure 5F\_V5

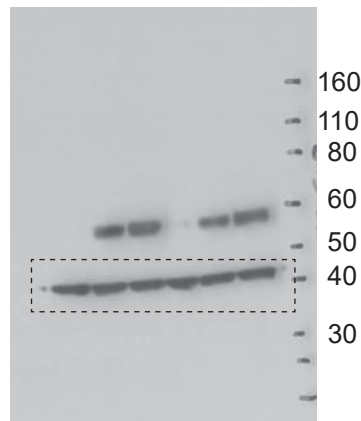

Figure 5F\_ACTB
