# Supplementary material for: Sensing of viral and endogenous RNA by ZBP1/DAI induces necroptosis
Source: PubMed Central journal article supplement (PMC5579359; doi:10.15252/embj.201796476), 2017-07-17
Supplement: EMBJ-36-2529-s008.pdf [file EMBJ-36-2529-s008.pdf]

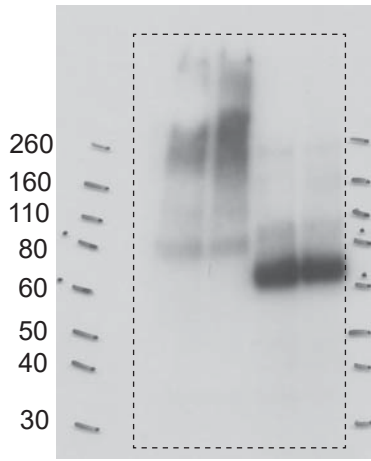

Figure 6B\_ autoradiogram

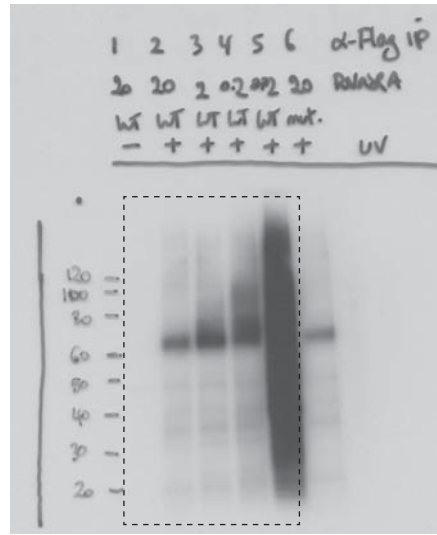

Figure 6C\_ autoradiogram

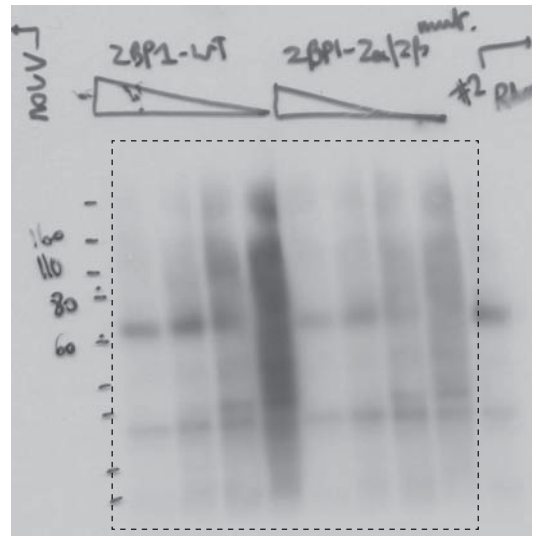

Figure 6D\_ autoradiogram
