# Supplementary material for: Sensing of viral and endogenous RNA by ZBP1/DAI induces necroptosis
Source: EMBO J. 2017 Jul 17;36(17):2529–43. doi: 10.15252/embj.201796476 (PMC5579359; doi:10.15252/embj.201796476)
Supplement: Supplementary file 2 — Expanded View Figures PDF [file EMBJ-36-2529-s002.pdf]

## Expanded View Figures

### Figure EV1. ZBP1-dependent necroptosis requires intact ZBP1 ZBDs (related to Fig 1).

- A, B SV40 large T antigen-immortalised MEFs of the indicated genotypes were treated or not with 100 U/ml of IFN- $\alpha$ /D for 16 h. (A) Cell extracts were subjected to Western blot analysis using the indicated antibodies. Asterisk (\*) indicates non-specific bands. (B) Cells were treated with 30 ng/ml TNF and 20  $\mu$ M zVAD (TZ) or were infected with the indicated viruses at an MOI of 10. After 16 h, cell viability was assessed using CellTiter-Glo reagent. Values for untreated cells were set to 100%.
- C HEK293T cells were transfected with 50 ng NF- $\kappa$ B firefly luciferase and 25 ng *Renilla* luciferase reporter plasmids, together with an expression vector for RIPK3. Luciferase activity was measured after 24 h, and the ratio of firefly and *Renilla* luciferase was set to 1 for control cells that did not receive RIPK3 plasmid.
- D NIH3T3 cells were treated with IFN- $\alpha$ /D for 16 h, and cell extracts were analysed by Western blot (top). Asterisk (\*) indicates a non-specific band. ZBP1-3xFLAG-reconstituted NIH3T3 cells were also tested by Western blot (bottom).
- E ZBP1-reconstituted NIH3T3 cells were infected as indicated and analysed as in (B).
- F Cells were treated with 1,000 U/ml of IFN- $\alpha$ /D for 16 h, and cell extracts were analysed by Western blot. Arrows indicate endogenous (lower band) and exogenous 3xFLAG-tagged ZBP1 (upper band).
- G Cells were infected with MCMV-M45<sup>mutRHIM</sup> at an MOI of 10 or treated with TZ and analysed as in (B).
- H Cell death was monitored upon infection or TZ treatment using an in-incubator imaging platform (Incucyte) and the dye YOYO-3, which stains dead cells.

Data information: Data are representative of three or more independent experiments. Panels (B, C, E, G and H) represent mean  $\pm$  SD ( $n = 3$ ). \* $P < 0.05$ , \*\* $P < 0.01$ , \*\*\* $P < 0.001$ ; two-way ANOVA.

Source data are available online for this figure.

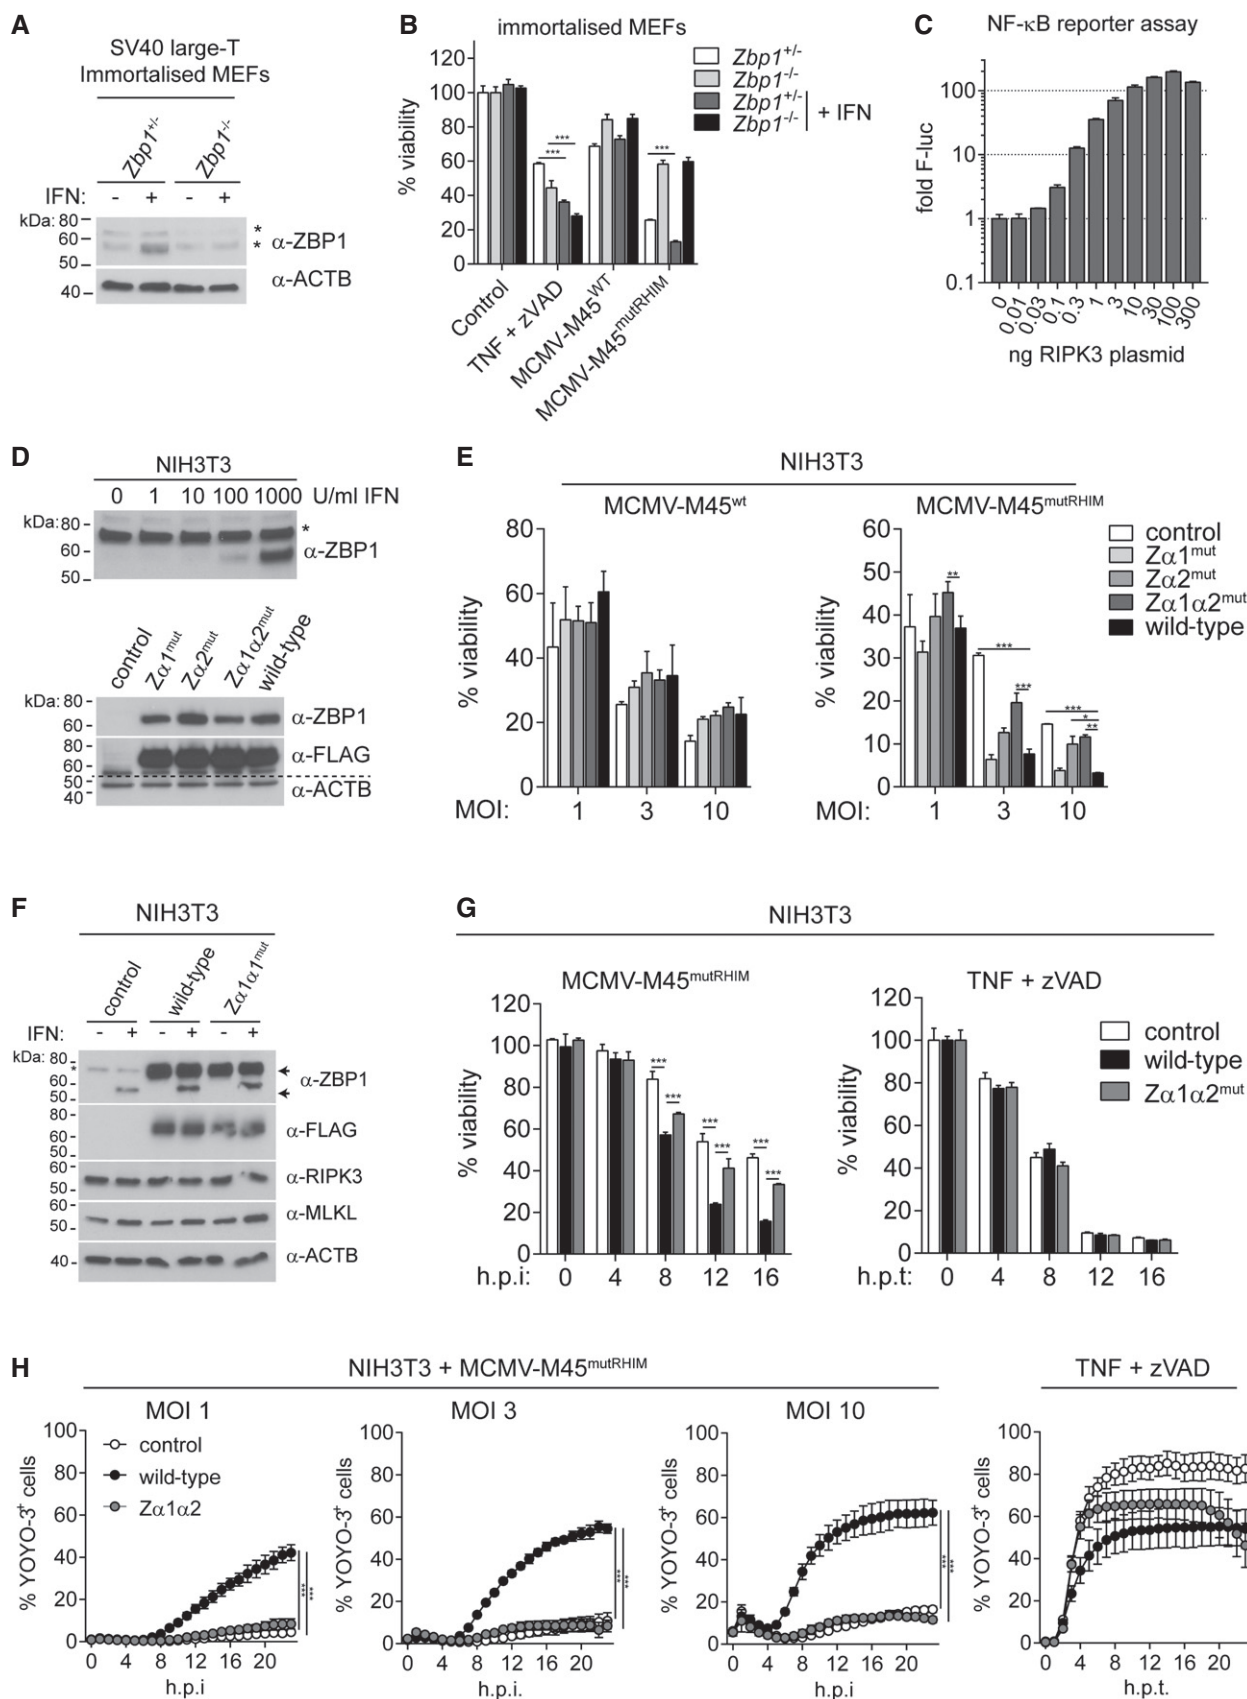

Figure EV1.

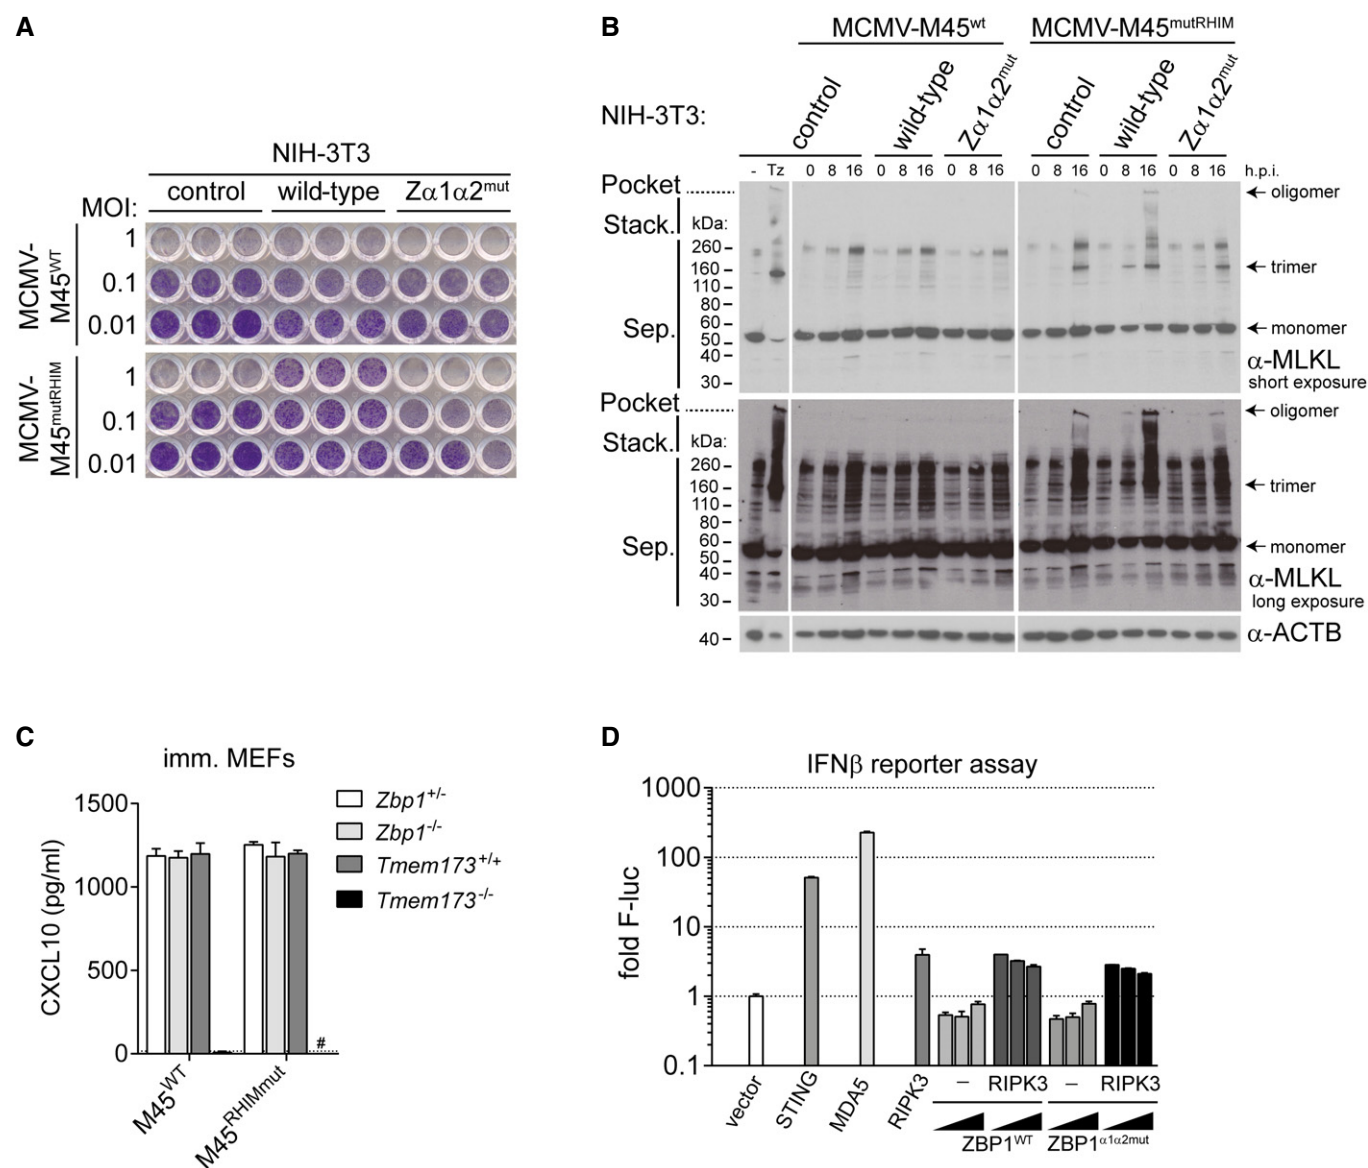

**Figure EV2. ZBP1 controls MCMV replication in NIH3T3 cells (related to Fig 2).**

- A NIH3T3 cells reconstituted with wild-type or mutant ZBP1 were infected as indicated. After 5 days, cells were fixed and stained with crystal violet.
- B NIH3T3 cells reconstituted with wild-type or mutant ZBP1 were infected as indicated using an MOI of 3. Control cells were treated with TZ. After 0, 8 or 16 h, cell lysates were subjected to Western blot analysis under non-reducing conditions using the indicated antibodies. Short and long exposures of  $\alpha$ -MLKL Western blot are shown.
- C CXCL10 was analysed by ELISA in supernatants from MEFs of the indicated genotypes infected with MCMV-M45<sup>WT</sup> or MCMV-M45<sup>mutRHIM</sup> (MOI = 3; 8 h). #not detected. The dotted line represents the lower limit of detection.
- D HEK293T cells were transfected with 125 ng IFN $\beta$  firefly luciferase and 25 ng *Renilla* luciferase reporter plasmids, together with expression vectors for HA-STING (500 ng), MDA5 (500 ng), RIPK3 (50 ng) or ZBP1-3xFLAG (20, 100, 500 ng). Luciferase activity was measured after 24 h and the ratio of firefly and *Renilla* luciferase was set to 1 for control cells transfected with empty vector.

Data information: Data are representative of two or more independent experiments. Panels (C and D) show mean  $\pm$  SD ( $n = 3$ ).

Source data are available online for this figure.

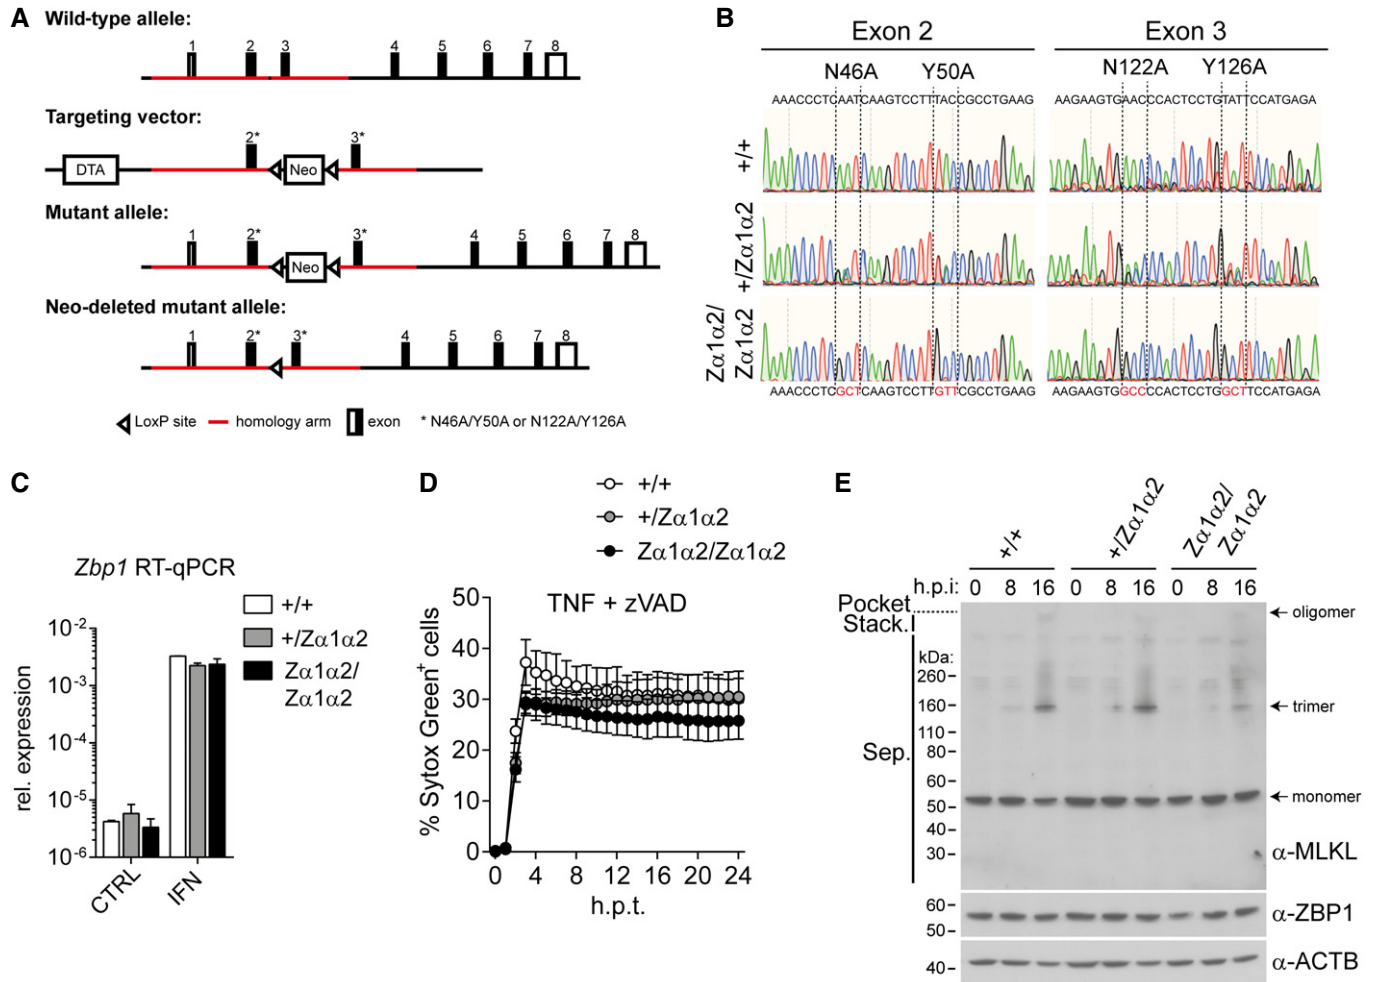**Figure EV3. Validation of ZBP1-Zα1α2<sup>mut</sup> knock-in (related to Fig 3).**

- A Targeting strategy. See Materials and Methods for further details.  
 B DNA fragments encompassing exon 2 or 3 were PCR-amplified from genomic DNA from primary MEFs of the indicated genotypes and were then sequenced.  
 C Primary MEFs of the indicated genotypes were treated with 100 U/ml IFN- $\alpha/\beta$  for 16 h. RNA was extracted, and *Zbp1* expression was analysed by RT qPCR.  
 D Cell death was monitored upon treatment with TNF using an in-cubator imaging platform (Incucyte) and the dye Sytox Green that stains dead cells.  
 E Non-reducing SDS-PAGE and Western blot for MLKL from samples from Fig 3D.

Data information: Data are representative of two or more independent experiments. Panels (C and D) show mean  $\pm$  SD ( $n = 3$ ).  
 Source data are available online for this figure.

**Figure EV4. ZBP1 binds newly synthesised RNA in MCMV-infected cells (related to Fig 4).**

- A NIH3T3 cells (top panel) or immortalised *Zbp1*<sup>-/-</sup> MEFs (lower panel) were treated with indicated concentrations of ganciclovir (GCV) and infected with MCMV-M45<sup>mutRHIM</sup> or UV-C inactivated MCMV-M45<sup>mutRHIM</sup> as indicated. After 5 days, cells were fixed and stained with crystal violet.  
 B RNA samples from the experiment shown in Fig 4B and C were analysed by RT qPCR.  
 C Structure of the MCMV IE1/3 gene. Four different siRNAs specifically targeting IE3 (exon 5) were designed.  
 D NIH3T3 cells were transfected with the indicated siRNAs and were then infected with MCMV-IE1/3-GFP. GFP-expressing cells were enumerated using Incucyte analysis.  
 E NIH3T3 cells expressing wild-type or mutant ZBP1 were infected with MCMV-M45<sup>mutRHIM</sup> (MOI 3) and 3 h post-infection 30 ng/ml TNF was added to the cells. Cell death was analysed as in Fig 4F.  
 F NIH3T3 cells expressing wild-type ZBP1 were transfected with the indicated siRNAs, infected with MCMV-M45<sup>mutRHIM</sup> (MOI 3) and 3 h post-infection 30 ng/ml TNF was added to the cells. Cell death was analysed as in Fig 4F.  
 G, H Immortalised *Zbp1*<sup>-/-</sup> MEFs reconstituted with wild-type ZBP1 were infected with MCMV-M45<sup>mutRHIM</sup> (MOI = 10) in the presence of neutralising anti-IFNAR1 or isotype control antibodies. (G) 16 h post-infection viability was assessed as in Fig 1B. (H) RNA samples were collected 8 h after infection and analysed by RT-qPCR.

Data information: Data are representative of two or more independent experiments. Panels (B, D–H) show mean  $\pm$  SD ( $n = 3$ ). \* $P < 0.05$ ; one-way ANOVA.

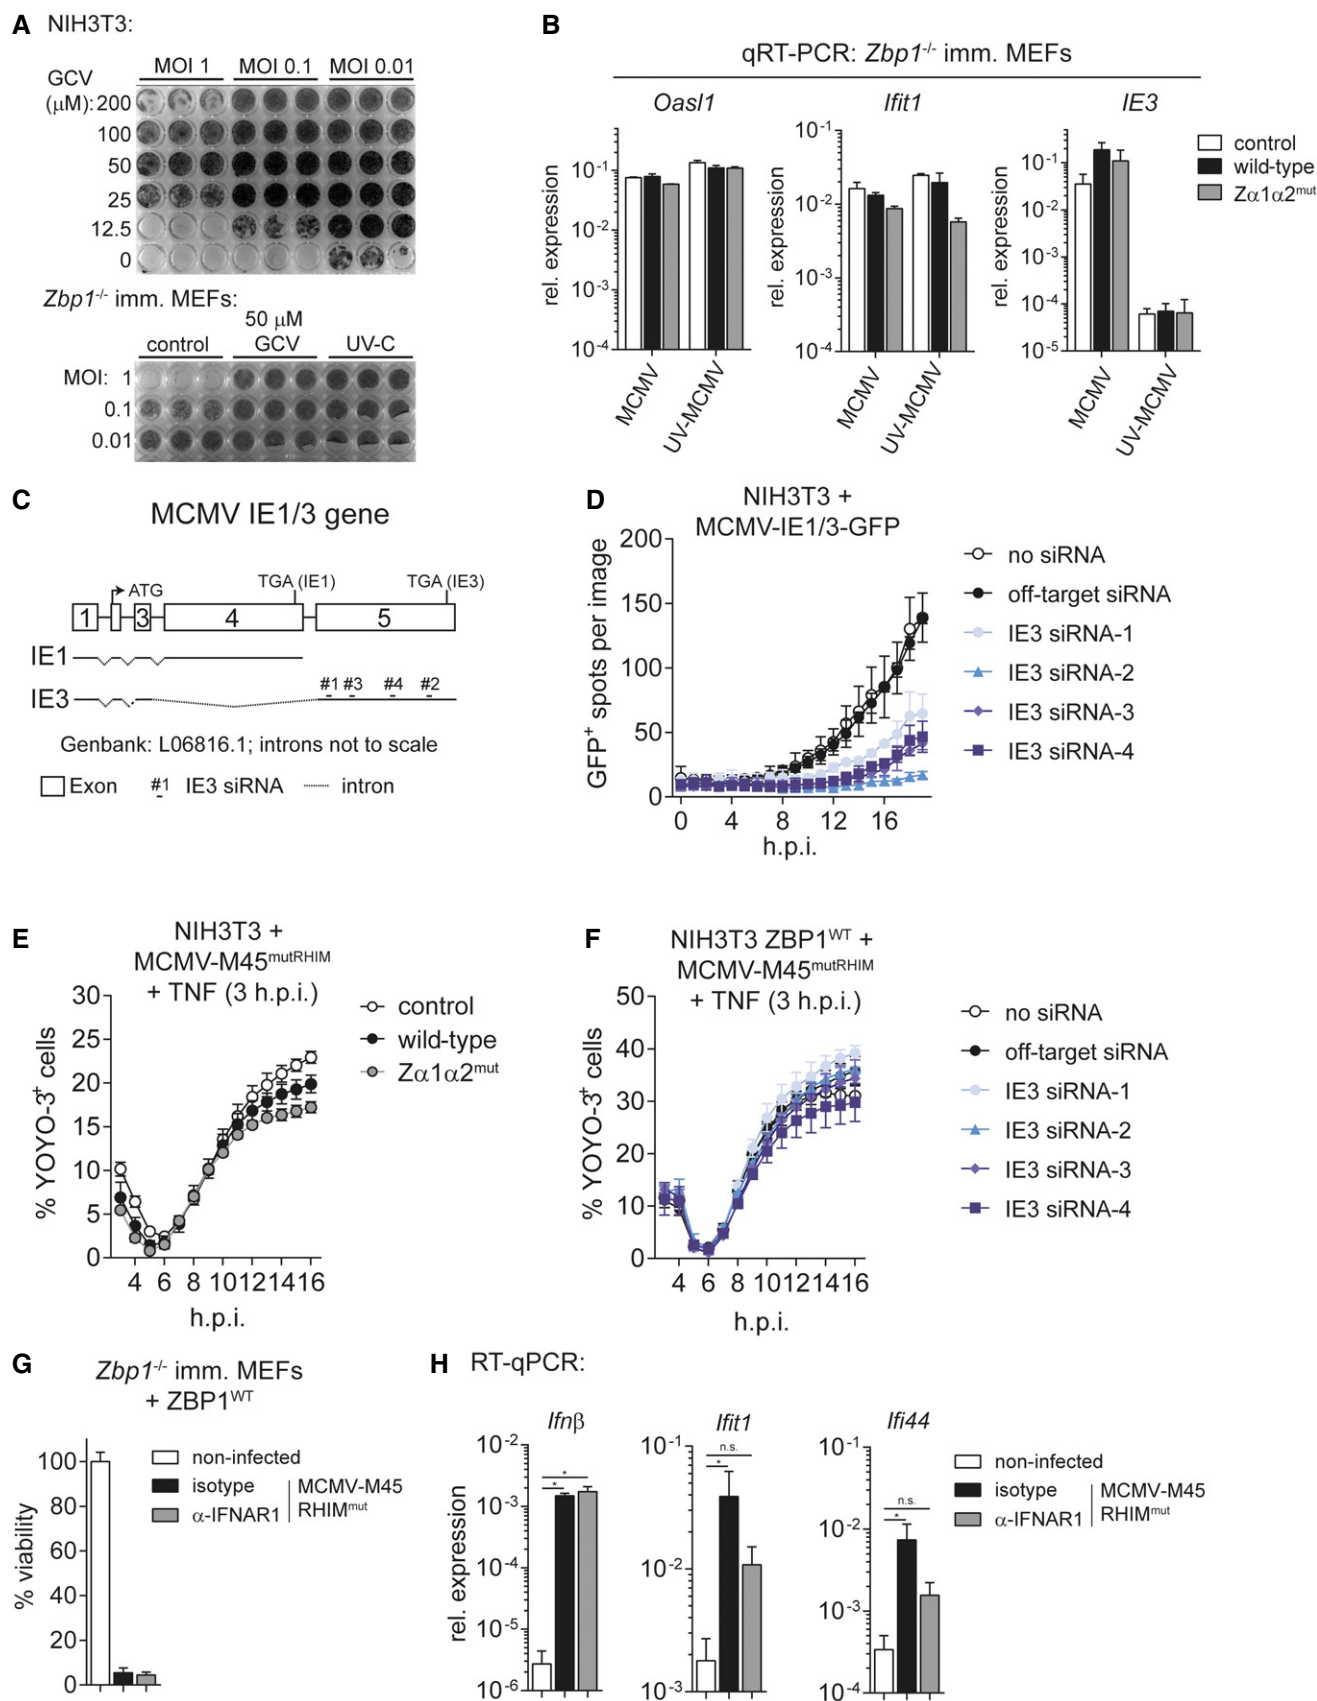

Figure EV4.

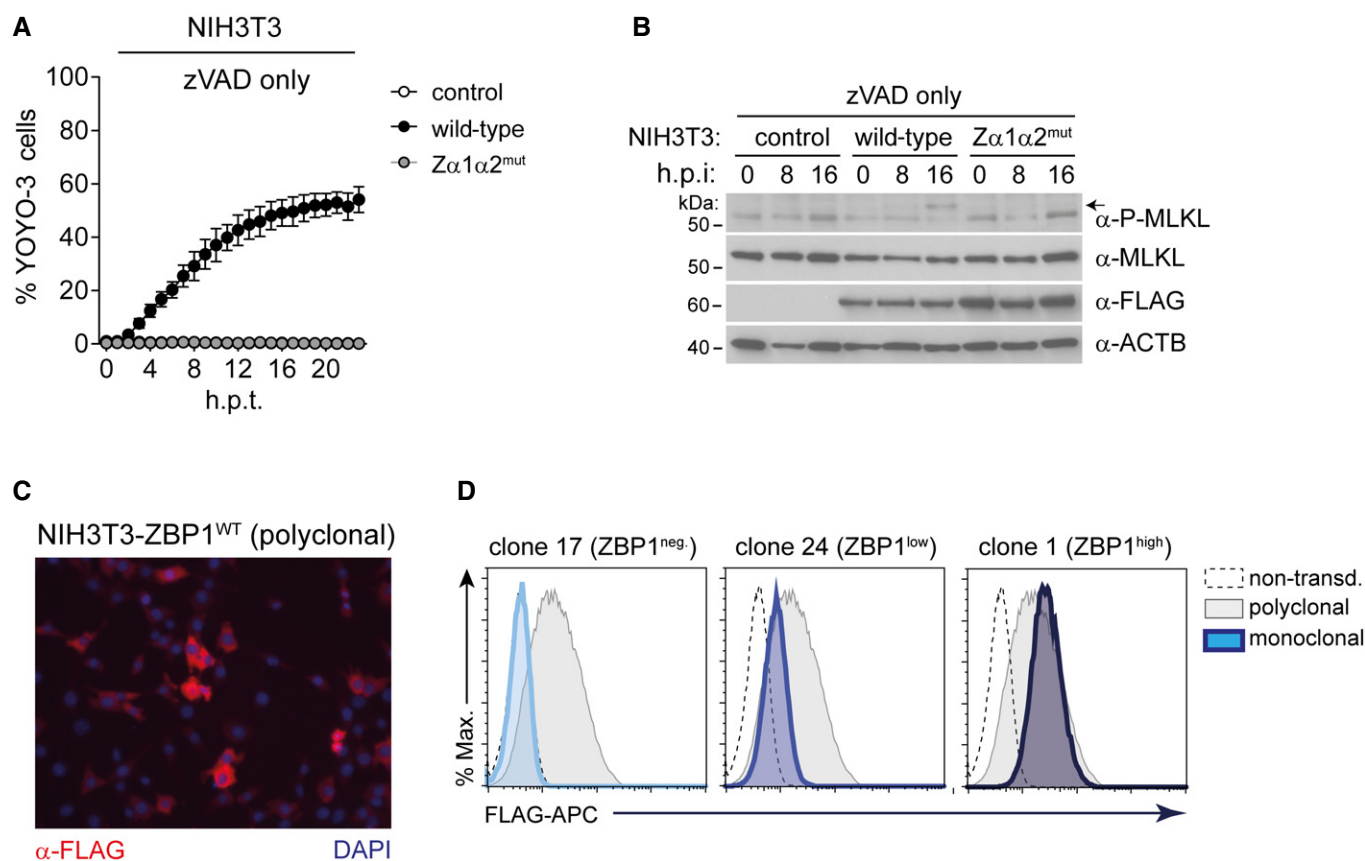

**Figure EV5. Generation of monoclonal ZBP1-expressing cell lines (related to Fig 5).**

- A NIH3T3 cells were treated with zVAD as in Fig 5A and viability was measured using an in-incubator imaging platform (Incucyte) and the dye YOYO-3 that stains dead cells.
- B NIH3T3 cells were treated with 20  $\mu$ M zVAD for 0, 8 and 16 h, and cell lysates were analysed by Western blot. The arrow indicates phosphorylated MLKL.
- C Immunofluorescence analysis of polyclonal wild-type ZBP1-3xFLAG-expressing NIH3T3 cells. Cells were stained with  $\alpha$ -FLAG-HRP and secondary anti-HRP-Alexa Fluor 594 antibodies.
- D Clonal cell lines were derived by limiting dilution and were then analysed by flow cytometry using  $\alpha$ -FLAG-APC antibody. Selected ZBP1 negative, low and high clones are shown.

Data information: Panel (A) shows mean  $\pm$  SD ( $n = 3$ ). Data are representative of two independent experiments.

Source data are available online for this figure.

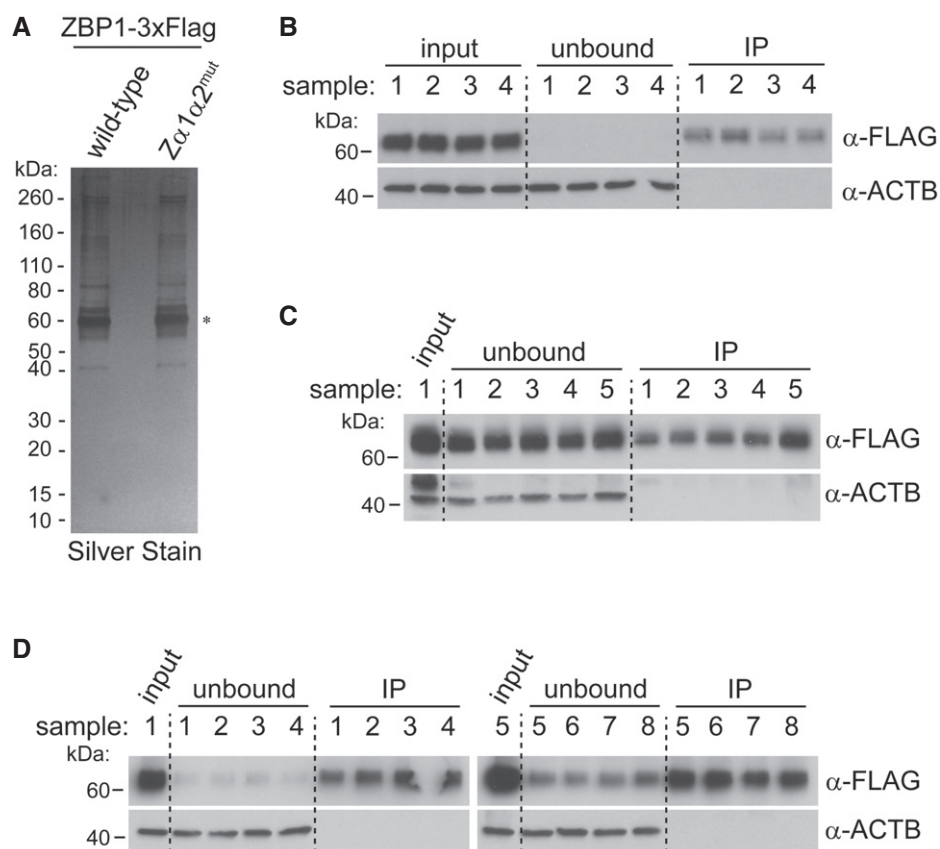

**Figure EV6. Purification of recombinant ZBP1 and Western blots for CLIP experiments (related to Fig 6).**

**A** HEK293T cells were transfected with plasmids expressing wild-type or mutant ZBP1-3xFLAG. Tagged ZBP1 was then purified by α-FLAG immunoprecipitation and analysed by SDS-PAGE and silver staining. Asterisk (\*) indicates silver stain of recombinant ZBP1.

**B–D** Western blots for input, unbound and immunoprecipitated samples corresponding to the autoradiograms shown in Fig 6B–D.

Data information: Data are representative of three independent experiments.

Source data are available online for this figure.
